# Supplementary material
Source: PubMed Central journal article supplement (PMC2607470)
Supplement: rsif20071309s02.pdf [file rsif20071309s02.pdf]

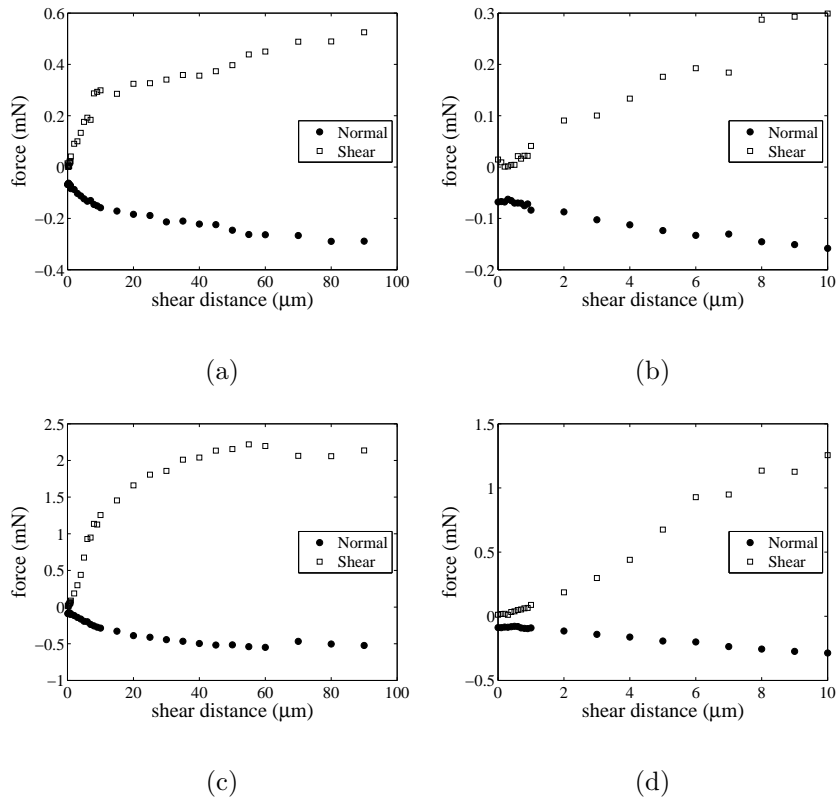

Figure 1. Data points represent the shear force measured at the highest pull-off value for LDP experiments performed with different shear distances. Preloads were (a,b) 0.5 mN and (c,d) 2.0 mN. Plots (b) and (d) are close-ups of plots (a) and (c), respectively.
